# Supplementary material
Source: publisher figshare collection journal article supplement (https://tandf.figshare.com/ndownloader/files/16383665)
Supplement: Supplementary file 1 [file 16383665]

**Supplementary Table 1:** Various definitions used in literature for subtypes of Peritoneal Tuberculosis

| **Terms used** | **Definitions used** | **References** |
| --- | --- | --- |
| Serous or Exudative | Ascites | 24, 35, 41, 49, 55, 75 |
| Plastic | No ascites; Omental thickening and infiltration, caseous masses and involvement of intestinal wall | 24, 26, 44, 55, 63, 64, 74, 75 |
| Wet or Wet Ascitic or Early or Humid | Ascites, ? Loculated Ascites | 12, 25-34, 36-41, 43, 44-54, 56-64, 66-74, 76, 78 |
| Dry or Late or Sclerosing | Adhesions | 25, 26, 30, 33, 36-39, 45, 47, 49, 56, 66-69, 72, 73 |
| Fibrotic fixed | Omental thickening, encysted ascites, matted loops, mesenteric involvement and masses | 12, 25, 26, 30-33, 35-37, 41, 43, 46, 48, 50-54, 57-62, 70 72, 73, 77 |
| Fibro-adhesive (often used with ascites) | Similar to plastic: mass of matted loops | 27, 42, 44, 65 |
| Mixed | Dry plus ascites | 28 |
| Dry-plastic | Peritoneal nodules, fibrous reaction and adhesions, minimal located or free ascites with septa | 12, 29, 31, 32, 35, 41, 43, 46, 48-49, 51-54, 57-62, 70, 76-78 |
| Fibrous | Adhesions, minimal fluid | 24, 40, 71 |
| Encysted or Loculated | Encysted ascites | 34, 40, 50, 71 |
| Purulent | Infected | 34, 40, 71 |
| Mass forming | Omental palpable masses | 68, 78 |

**Supplementary Table 2**: Frequency of subtypes of Peritoneal tuberculosis as reported in various series (Original papers where frequencies are mentioned)

| **STUDY** | **WET ASCITIC** | **DRY PLASTIC** | **FIXED FIBROTIC** | **MIXED** |
| --- | --- | --- | --- | --- |
| Cavalli et al[28] | 13.8%(4/32) | 8.9%(3/32) |  | 75%(24/32) |
| Delisle et al (Pediatric Series)[30] | 0(0) | 18%(2/11) | 82%(9/11) |  |
| Malik R et al (Pediatric Series)[31] | 88.8%(8/9) | 11.1%(1/11) |  |  |
| Yin et al[32] | 96.3%(26/27) | 3.7%(1/27) |  |  |
| Tarcoveanu et al[42] | 90%(16/18) |  | 10%(2/18) |  |
| Safarpor F et al[45] | 85%(22/26) |  | 15%(4/26) |  |
| Tongsong T et al[47] | 87%(14/16) | 13%(2/16) |  |  |
| Vasquez Munoz et al[51] | 71%(5/7) |  | 29%(2/7) |  |
| Sinan T et al[56] | 52.3%(21/38) | 45.7%(17/38) |  |  |
| Zissin R et al[59] | 80%(8/10) |  | 20%(2/10) |  |
| Yapar EG et al [67] | 80%(12/15) |  |  | 20%(2/15) |
| Sheikh M et al[68] | 66%(6/9) | 22%(2/9) | 11%(1/9) |  |
| Denton T et al[73] | 92%(11/12) | 8%(1/12) |  |  |
| Sandikci MU et al[75] | 95.6%(129/135) | 4.4%(6/135) |  |  |
| Hossain K et al[76] | 63%(14/22) | 37%(8/22) |  |  |
